# Supplementary material for: Cardiac-specific loss of mitoNEET expression is linked with age-related heart failure
Source: Springer Nature journal article supplement (doi:10.1038/s42003-021-01675-4), 2021-01-29
Supplement: 42003_2021_1675_MOESM2_ESM.pdf [file 42003_2021_1675_MOESM2_ESM.pdf]

1 **Cardiac-specific loss of mitoNEET expression is linked with age-related heart**  
2 **failure**

3

4 Takaaki Furihata, Shingo Takada, Naoya Kakutani, Satoshi Maekawa, Masaya Tsuda,

5 Junichi Matsumoto, Wataru Mizushima, Arata Fukushima, Takashi Yokota, Nobuyuki

6 Enzan, Shouji Matsushima, Haruka Handa, Yoshizuki Fumoto, Junko Nio-Kobayashi,

7 Toshihiko Iwanaga, Shinya Tanaka, Hiroyuki Tsutsui, Hisataka Sabe, and Shintaro

8 Kinugawa

9

10

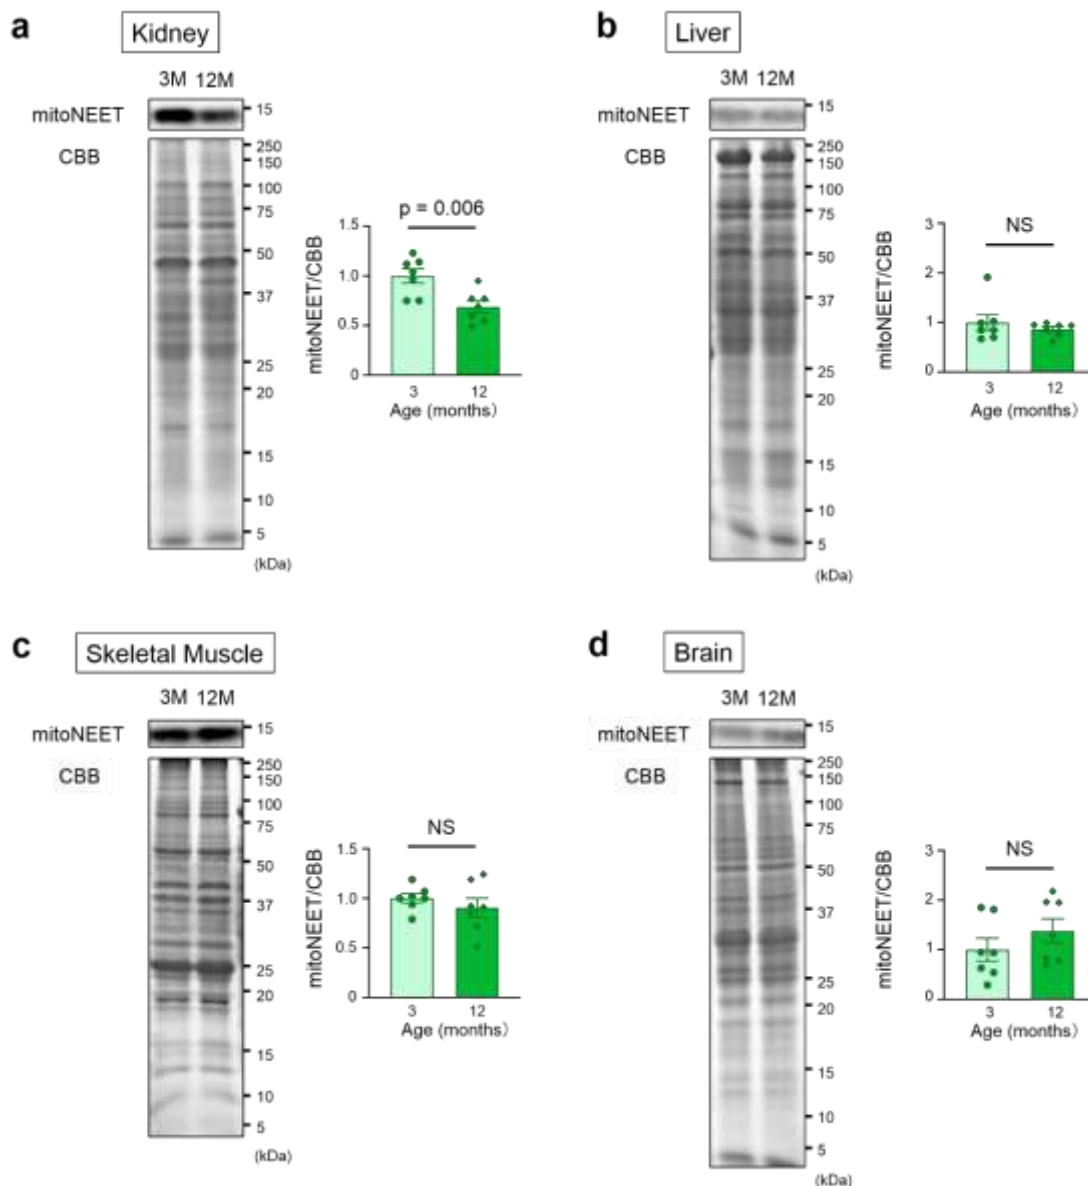

11

12 **Supplementary Figure 1. MitoNEET protein expression in various organs**

13 Representative immunoblot and summary data of mitoNEET protein expression in the  
14 kidney (a), liver (b), skeletal muscle (c), and brain (d) of C57BL/6J mice at 3 months (n  
15 = 7) and 12 months (n = 7) of age. Data are shown as the mean  $\pm$  s.e; individual data  
16 points are shown. The Student unpaired two-tailed *t*-test was performed to compare  
17 means between 2 groups. ; CBB, Coomassie Brilliant Blue; NS, not significant.

18

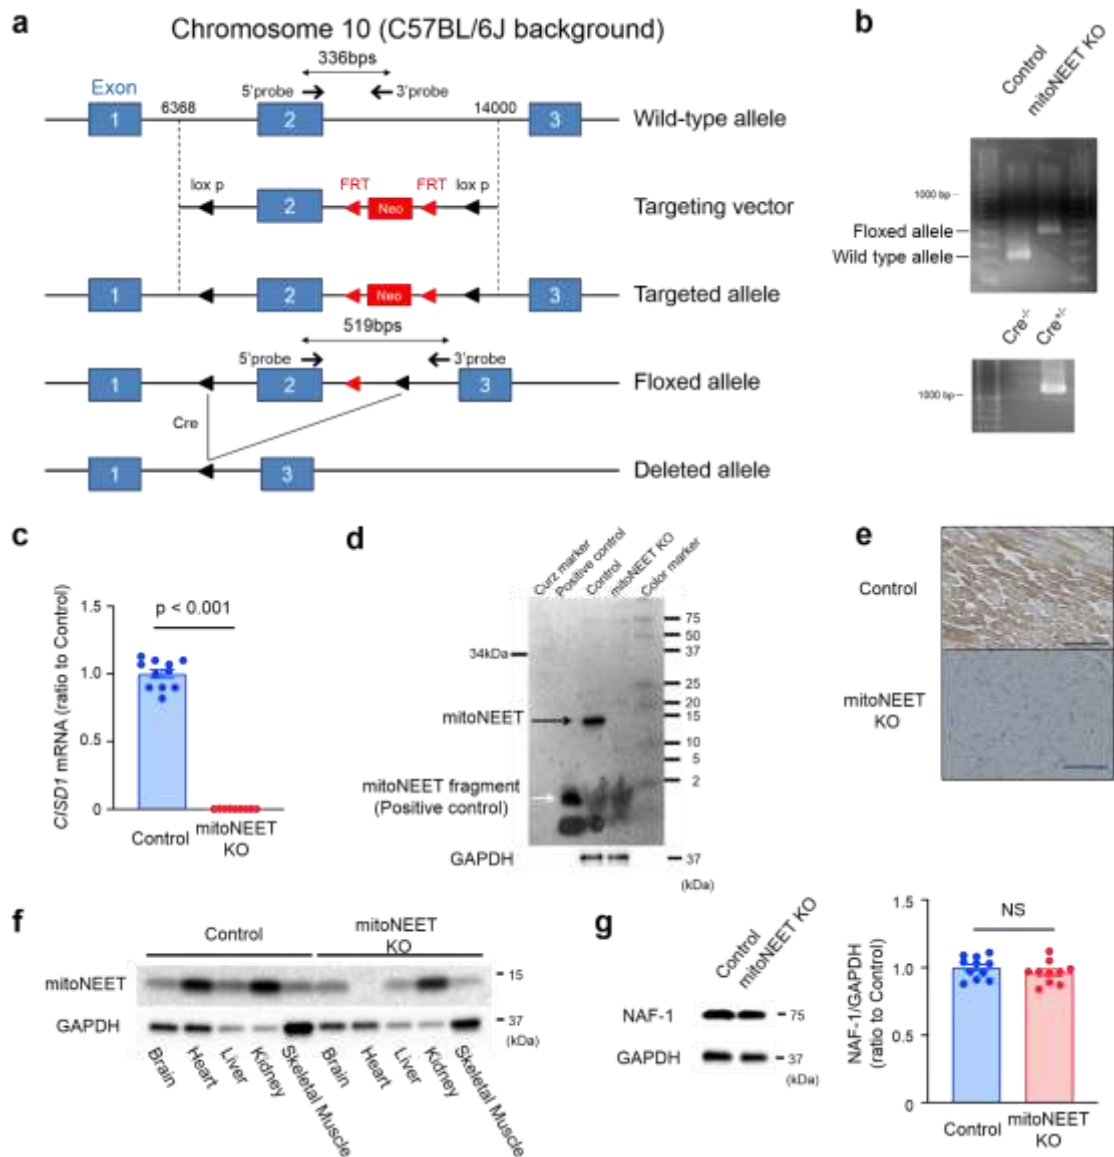

19

20 **Supplementary Figure 2. Method of generation of cardiac-specific mitoNEET KO**  
 21 **mice**

22 (a) Design of the mitoNEET targeting construct and the genomic structure of  
 23 mitoNEET. LoxP sites were inserted to delete the entire exon 2, resulting in early  
 24 termination and truncation of the C-terminal region of mitoNEET. This resulted in the  
 25 complete destruction of mitoNEET function. The indicated primers were used for  
 26 detecting the mitoNEET floxed allele. (b) Wild-type and mitoNEET floxed alleles were  
 27 distinguished by PCR analysis. Genomic PCR confirmed the mitoNEET floxed allele

28 and Cre allele in mitoNEET KO mice. (c) Quantitative analysis of the expression of  
29 *CISDI* mRNA in the hearts of Control (n = 11) and mitoNEET KO mice (n = 10). Data  
30 are shown as the mean  $\pm$  s.e.; individual data points are shown. \* $p < 0.05$  vs. Control  
31 (two-tailed *t*-test). (d) Representative immunoblots of Tris-Tricine SDS-PAGE lysates  
32 from Control and mitoNEET KO mice, and the mitoNEET peptide fragment. The black  
33 arrow (about 14 kDa) indicates mitoNEET, and the white arrow (just below 2 kDa)  
34 indicates the mitoNEET fragment used as a positive control. (e) Representative  
35 immunostaining for mitoNEET in myocardial sections. Scale bar, 50  $\mu$ m. (f)  
36 Representative immunoblot of the mitoNEET protein in various organs from mitoNEET  
37 KO mice and Control mice. (g) Representative immunoblot and summary data of  
38 Miner1 protein expression normalized to GAPDH in the hearts of Control (n = 11) and  
39 mitoNEET KO mice (n = 10). Data are shown as the mean  $\pm$  s.e.; individual data points  
40 are shown. The Student unpaired two-tailed *t*-test was performed to compare means  
41 between Control and mitoNEET KO mice. GAPDH, glyceraldehyde phosphate  
42 dehydrogenase. NS, not significant.

43

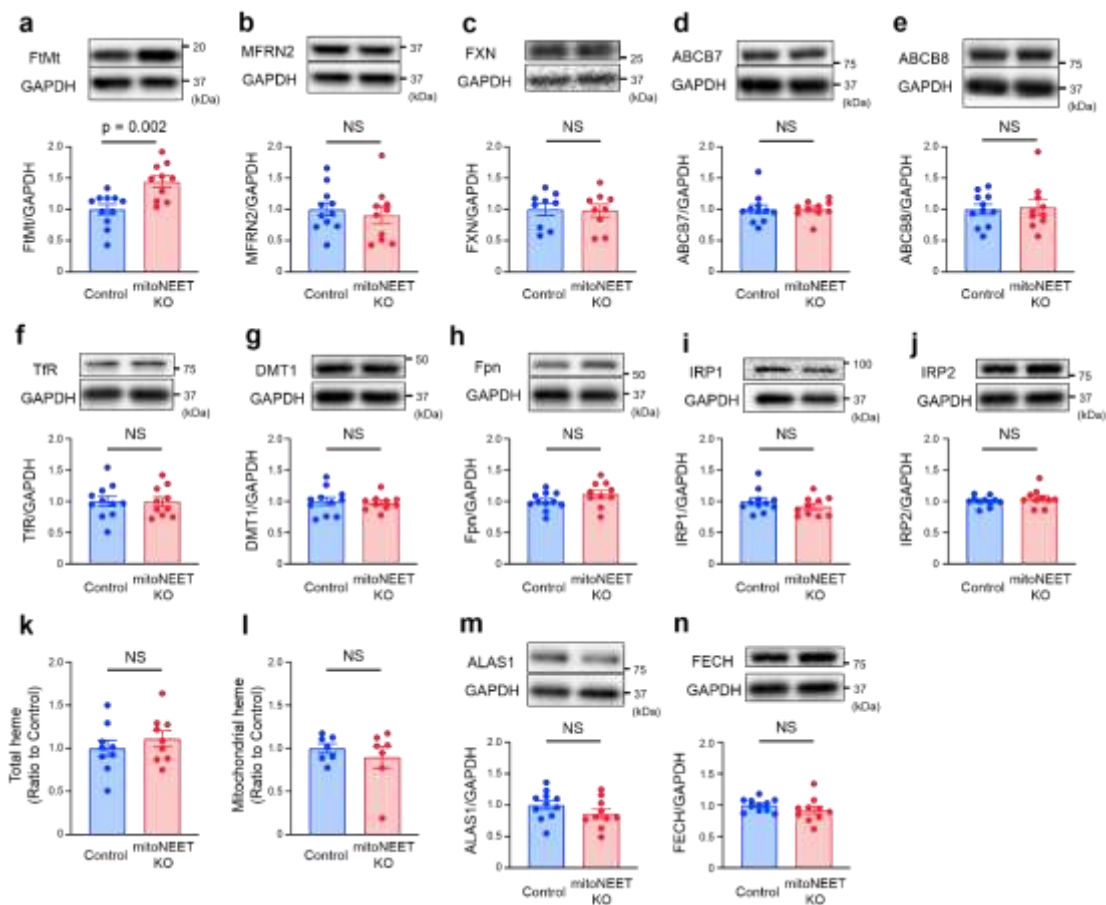

44

45 **Supplementary Figure 3. Expression levels of proteins associated with iron**  
 46 **homeostasis and heme synthesis in the heart**

47 Representative immunoblots and summary data of the protein expression of FtMt (a),  
 48 MFRN2 (b), FXN (c), ABCB7 (d), ABCB8 (e), TfR (f), DMT1 (g), Fpn (h), IRP1 (i),  
 49 and IRP2 (j) normalized to GAPDH in the hearts of Control (n = 11) and mitoNEET  
 50 KO mice (n = 10). Levels of total heme (k) and mitochondrial heme (l) in mitoNEET  
 51 KO mice (n = 9) relative to Control mice (n = 9). Representative immunoblots and  
 52 summary data of the protein expression of ALAS1 (m) and FECH (n) normalized to  
 53 GAPDH in the hearts of Control (n = 11) and mitoNEET KO mice (n = 10). Data are  
 54 shown as the mean  $\pm$  s.e.; individual data points are shown. The Student unpaired two-  
 55 tailed *t*-test was performed to compare means between Control and mitoNEET KO mice

56 of identical age. GAPDH, glyceraldehyde phosphate dehydrogenase; FtMt,  
57 mitochondrial ferritin; MFRN2, mitoferrin-2; FXN, frataxin; ABCB7, ATP-binding  
58 cassette protein B7; ABCB8, ATP-binding cassette protein B8; TfR, transferrin  
59 receptor; DMT1, divalent metal transporter 1; Fpn, ferroportin; IRP1, iron regulatory  
60 protein 1; IRP2, iron regulatory protein 2; ALAS1, 5'-aminolevulinate synthase 1;  
61 FECH, ferrochelatase; NS, not significant  
62

63 **Supplementary Table 1. Characteristics of the mice used in this study**

| Age                         | 3 months   |            | 12 months  |            | 16 months  |            |
|-----------------------------|------------|------------|------------|------------|------------|------------|
|                             | Control    | mitoNEET   | Control    | mitoNEET   | Control    | mitoNEET   |
|                             |            | KO         |            | KO         |            | KO         |
| n                           | 11         | 10         | 8          | 9          | 5          | 5          |
| BW (g)                      | 19.4 ± 0.3 | 19.6 ± 0.5 | 28.6 ± 1.6 | 28.8 ± 1.8 | 33.8 ± 2.5 | 32.5 ± 0.9 |
| LVW/BW<br>(mg/g)            | 3.5 ± 0.2  | 3.2 ± 0.1  | 2.8 ± 0.1  | 3.7 ± 0.4* | 2.6 ± 0.1  | 3.5 ± 0.2* |
| Lung<br>weight/BW<br>(mg/g) | 7.2 ± 0.1  | 6.7 ± 0.2  | 6.3 ± 0.3  | 6.9 ± 0.7  | 4.6 ± 0.2  | 5.8 ± 0.4* |

64 Data are shown as the mean ± s.e.; \* $p < 0.05$  vs. Controls of the same age (two-tailed  $t$ -  
 65 test). KO, knockout; BW, body weight; LVW, left ventricular weight

66

67

68 Original Western blots in Figure 1a and Figure 5c and d  
 69

Figure 1

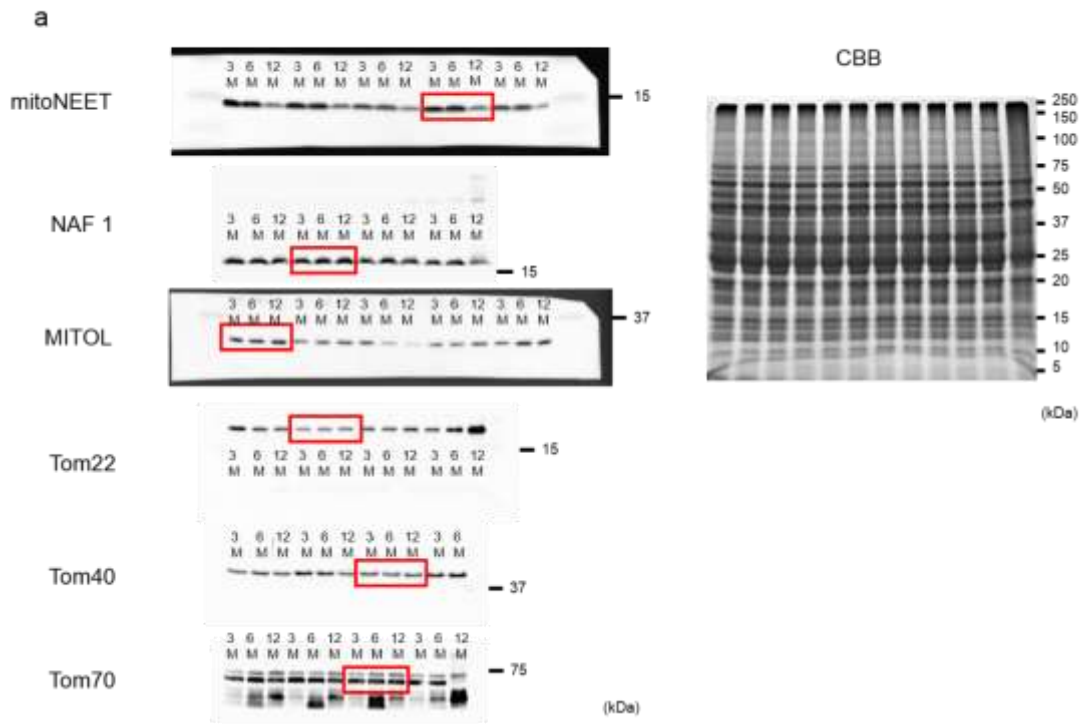

70  
 71

Figure 5

c, d

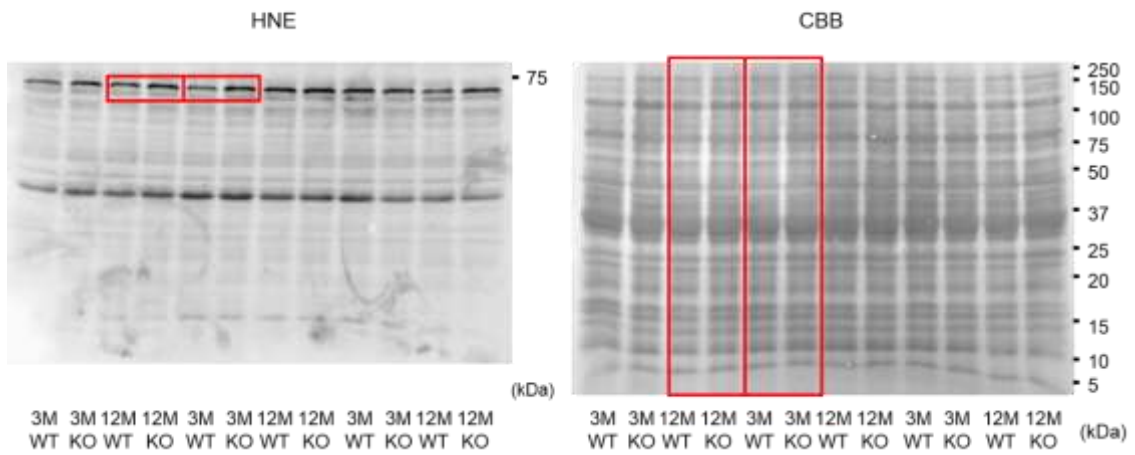

72  
 73  
 74



75 Original Western blots in Supplementary Figure 1a-d and 2b  
76

Supplemental Figure 1

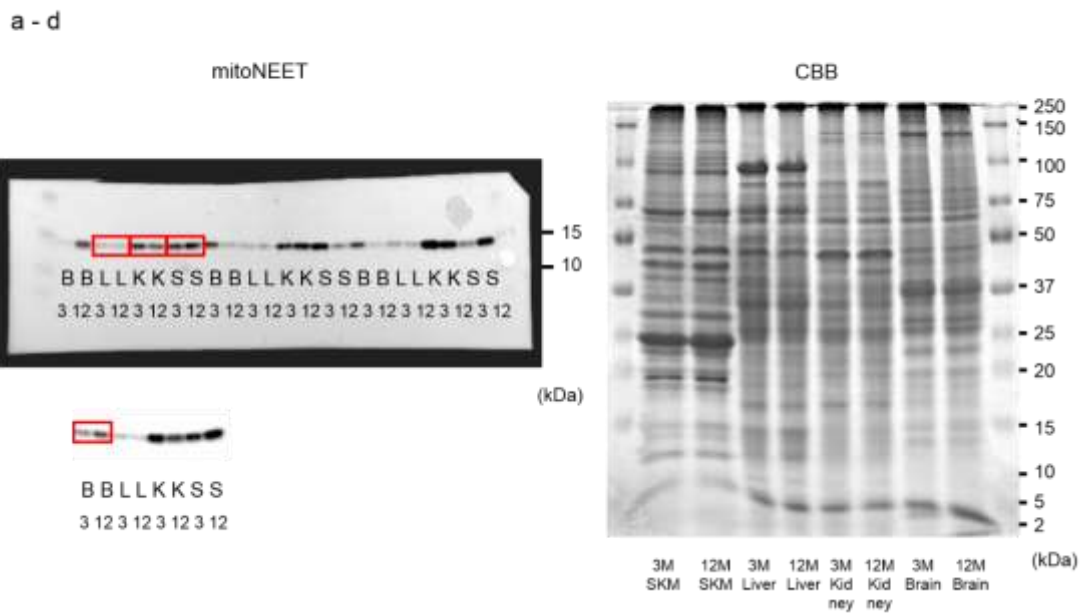

77  
78

Supplemental Figure 2

b

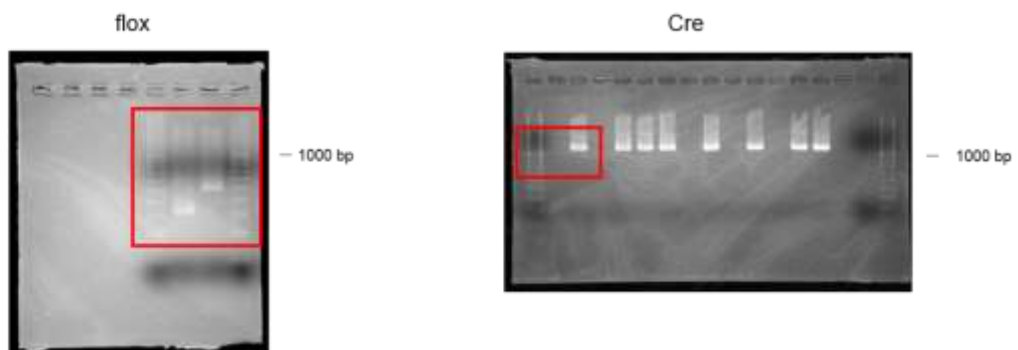

79  
80  
81

82 Original Western blots in Supplementary Figure 2d, f, and g  
83

Supplemental Figure 2

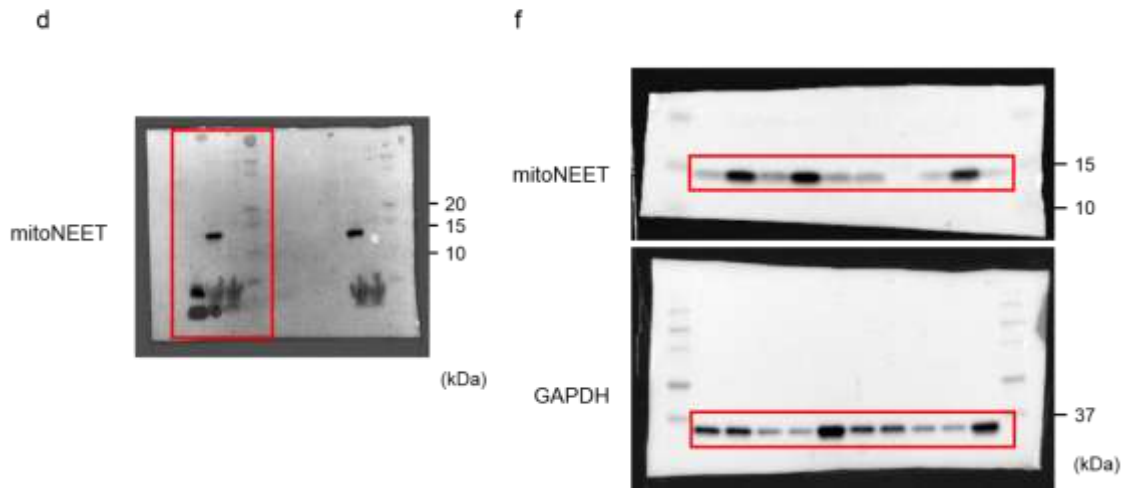

84  
85

Supplemental Figure 2

g

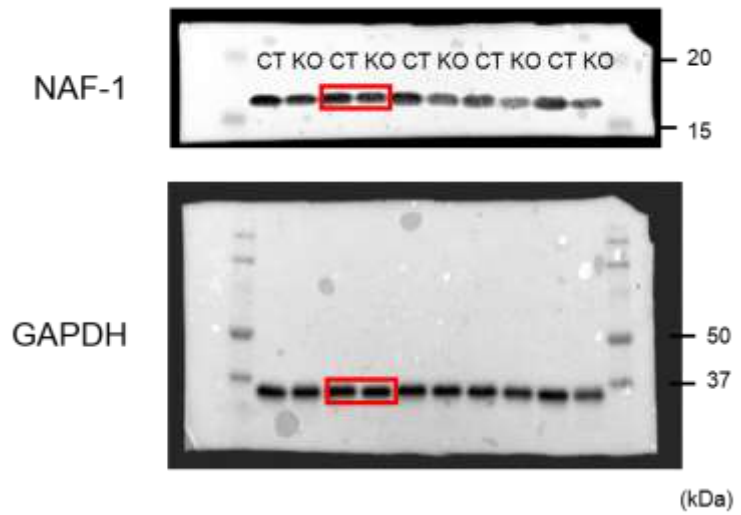

86  
87  
88

89 Original Western blots in Supplementary Figure 3a-d  
90

Supplemental Figure 3

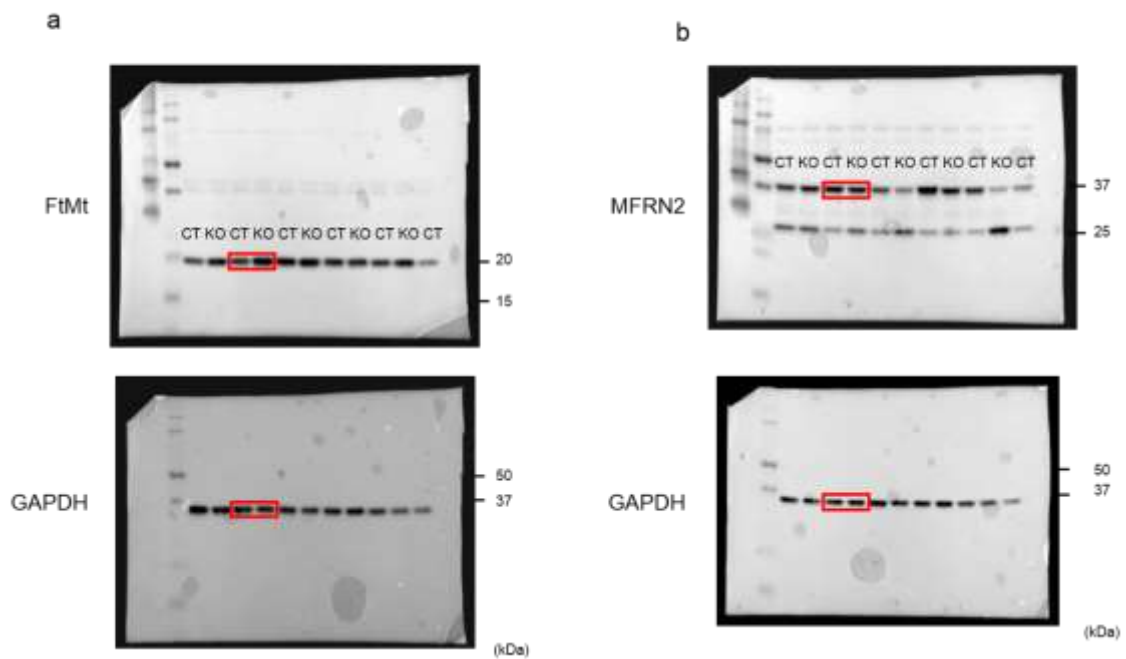

91  
92

Supplemental Figure 3

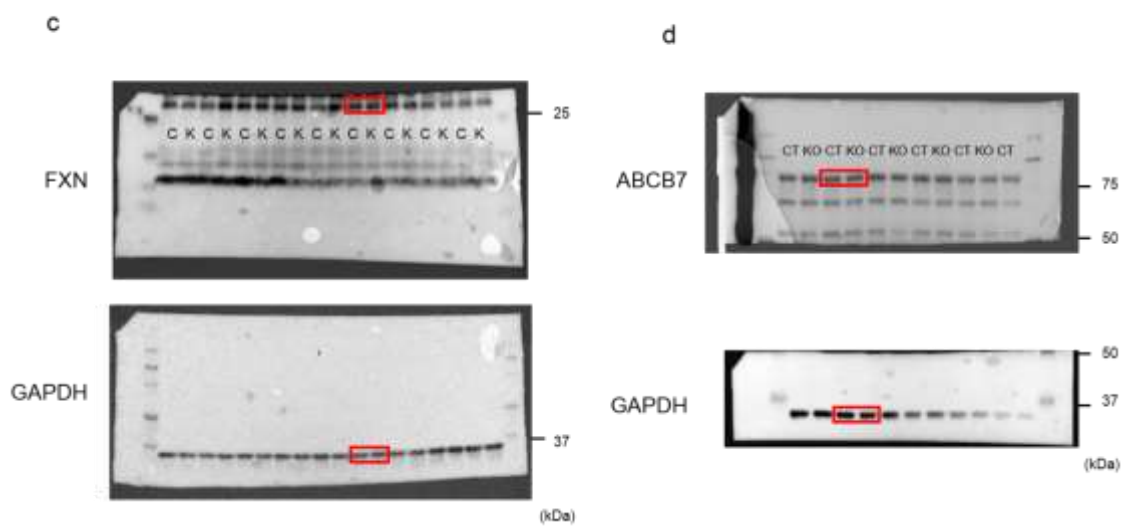

93  
94  
95

96 Original Western blots in Supplementary Figure 3e-h  
97

Supplemental Figure 3

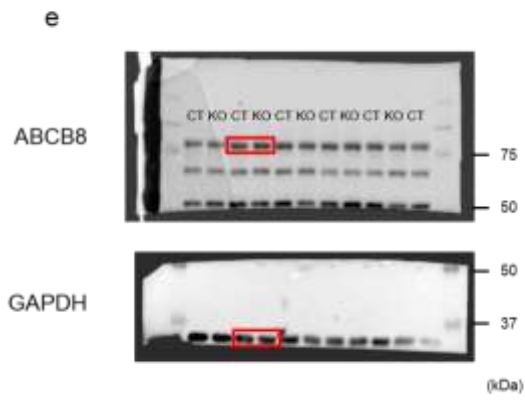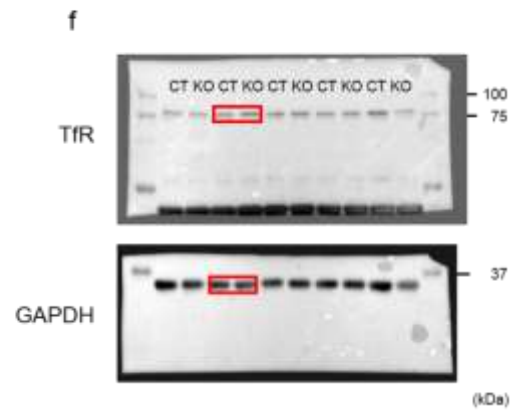

98  
99

Supplemental Figure 3

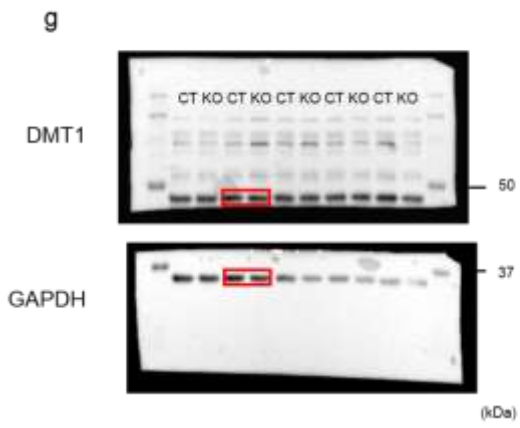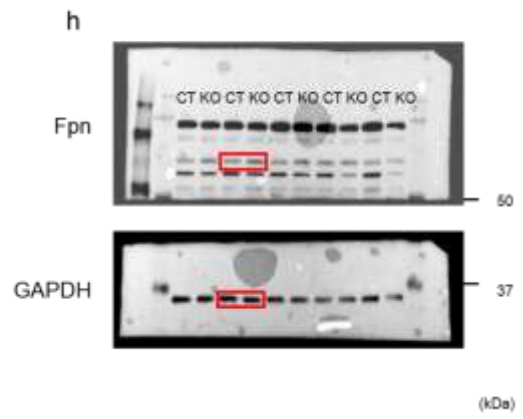

100  
101  
102

103 Original Western blots in Supplementary Figure 3i, j, m, n  
104

Supplemental Figure 3

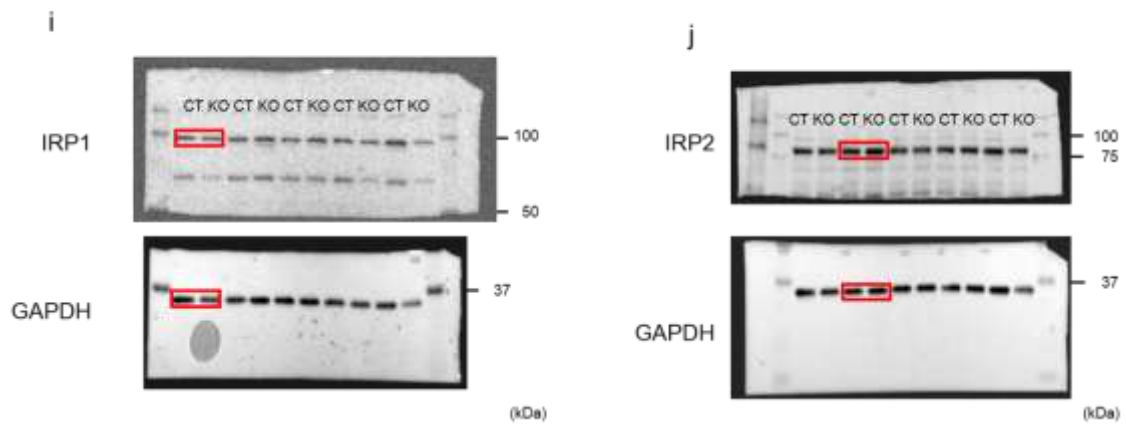

105  
106

Supplemental Figure 3

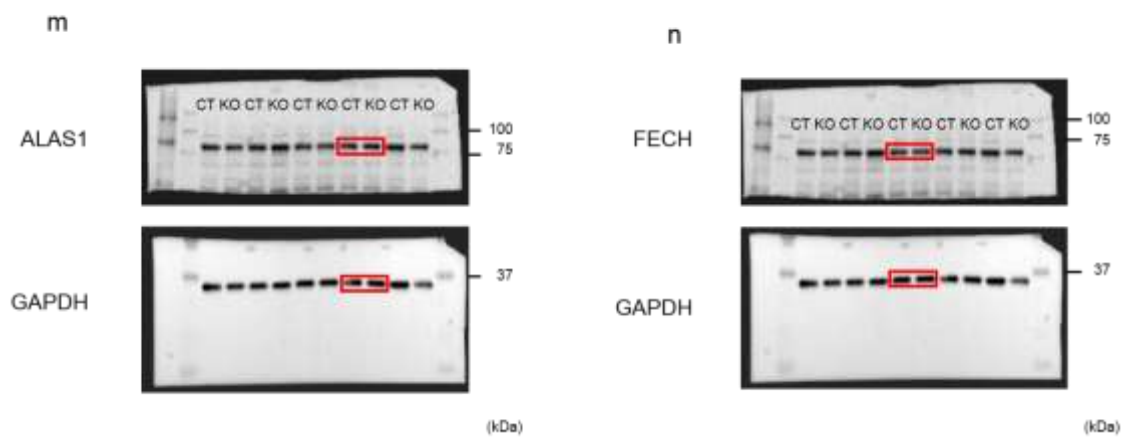

107
