# Supplementary material for: Cardiac-specific loss of mitoNEET expression is linked with age-related heart failure
Source: Springer Nature journal article supplement (doi:10.1038/s42003-021-01675-4), 2021-01-29
Supplement: 42003_2021_1675_MOESM3_ESM.pdf [file 42003_2021_1675_MOESM3_ESM.pdf]

## **Description of Additional Supplementary Files**

File Name: Supplementary Data 1

Description: Raw data underlying plots in all figures including Figure 1-5 and Supplemental Figure 1-3 are available in Supplementary Data
